# Supplementary material
Source: MDPI journal article supplement (https://www.mdpi.com/2073-4352/11/12/1547)
Supplement: s1 [file s1]

**Supplemental Information**

# Four isostructural 3d-4f mixed metal organic frameworks and their magnetic properties.

*Marie Mortensen, Abigail L. Lewis, Gregory McCandless, and Kenneth J. Balkus Jr. \**

*The University of Texas at Dallas, 800 W Campbell Rd, Richardson, TX 75080*

## Table of Contents

|                                        |   |
|----------------------------------------|---|
| Lanthanide-Oxygen bond lengths.....    | 3 |
| Single Crystal Structures.....         | 4 |
| Powder X-Ray Diffraction (PXRD).....   | 5 |
| Thermogravimetric Analysis (TGA) ..... | 7 |

## Lanthanide-Oxygen bond lengths

Table S1: The distances of each lanthanide-oxygen bonds for **1**, **2**, **3**, and **4**.

|                 | Cu Gd <sub>2</sub> (BDC) <sub>4</sub> | Cu Ho <sub>2</sub> (BDC) <sub>4</sub> | Cu Eu <sub>2</sub> (BDC) <sub>4</sub> | Cu Dy <sub>2</sub> (BDC) <sub>4</sub> |
|-----------------|---------------------------------------|---------------------------------------|---------------------------------------|---------------------------------------|
| <b>Ln1-O1/Å</b> | 2.309                                 | 2.267                                 | 2.320                                 | 2.273                                 |
| <b>Ln1-O4/Å</b> | 2.312                                 | 2.279                                 | 2.321                                 | 2.285                                 |
| <b>Ln1-O5/Å</b> | 2.323                                 | 2.287                                 | 2.332                                 | 2.295                                 |
| <b>Ln1-O8/Å</b> | 2.329                                 | 2.291                                 | 2.342                                 | 2.305                                 |
| <b>Ln1-O3/Å</b> | 2.356                                 | 2.312                                 | 2.372                                 | 2.325                                 |
| <b>Ln1-O2/Å</b> | 2.361                                 | 2.323                                 | 2.372                                 | 2.330                                 |
| <b>Ln1-O9/Å</b> | 2.373                                 | 2.332                                 | 2.386                                 | 2.350                                 |

## Single Crystal Structures

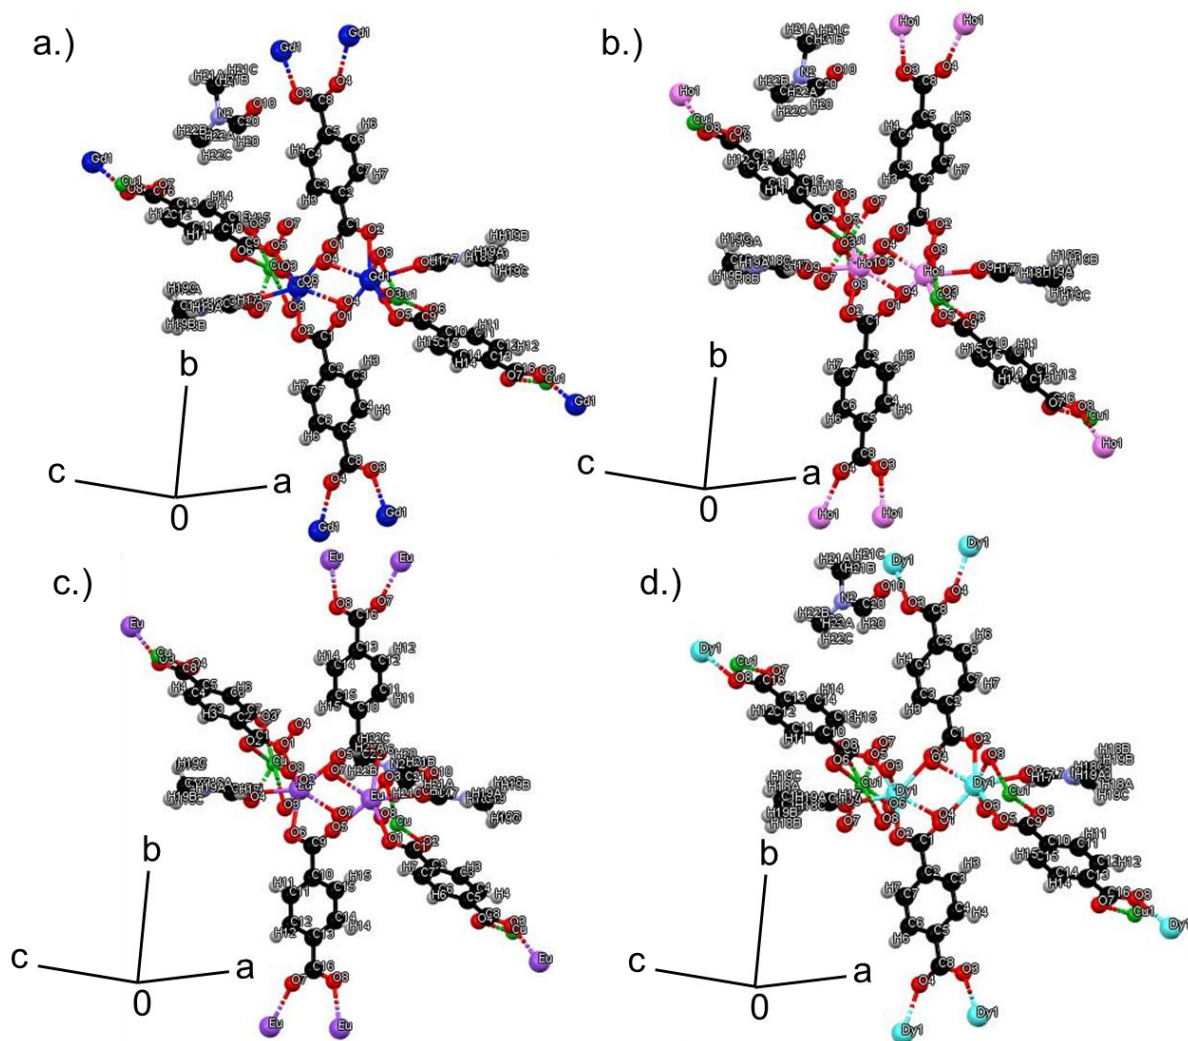

**Figure S1:** The asymmetric unit of each of the four complexes with the atoms labeled. (a.) The asymmetric unit of compound **1**. (b.) The asymmetric unit of compound **2**. (c.) The asymmetric unit of compound **3**. (d.) The asymmetric unit of compound **4**. The colors for elements are as follows: gadolinium (blue), holmium (pink), europium (purple), dysprosium (light blue), copper (green) oxygen (red), carbon (black), nitrogen (purple), hydrogen (white).

## Powder X-Ray Diffraction (PXRD)

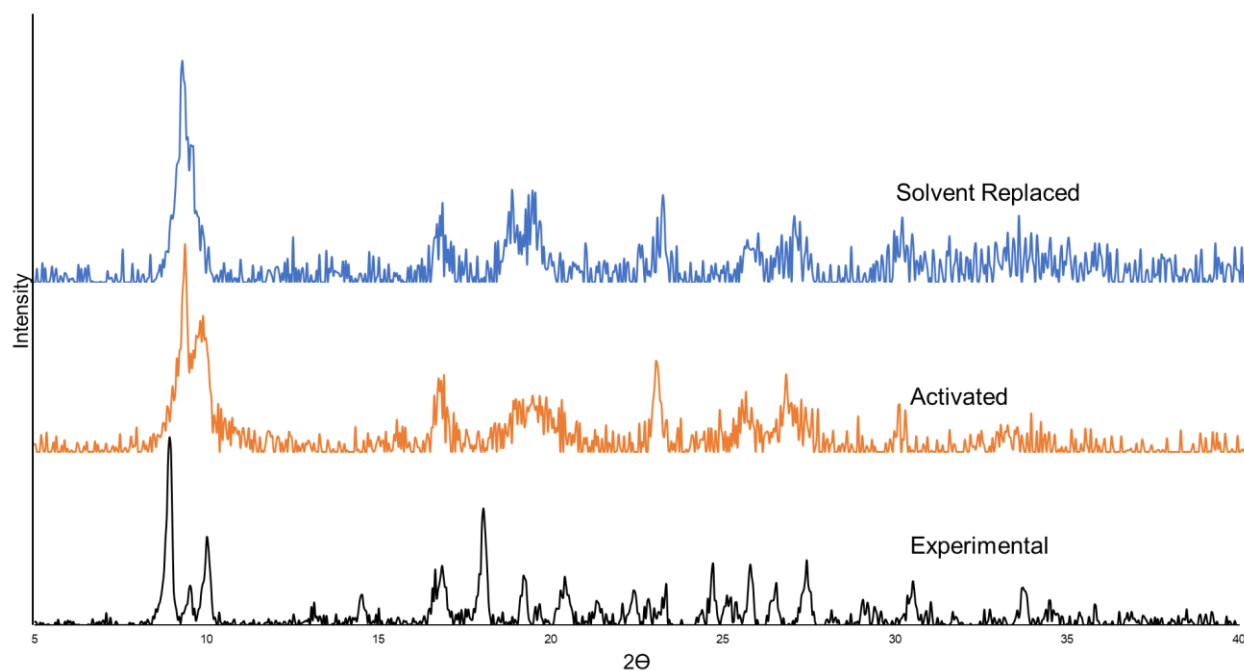

**Figure S2:** The comparison of the activated and solvent replaced PXRDs of compound **1** with the experimental (black), Activated (orange), and solvent replaced (blue).

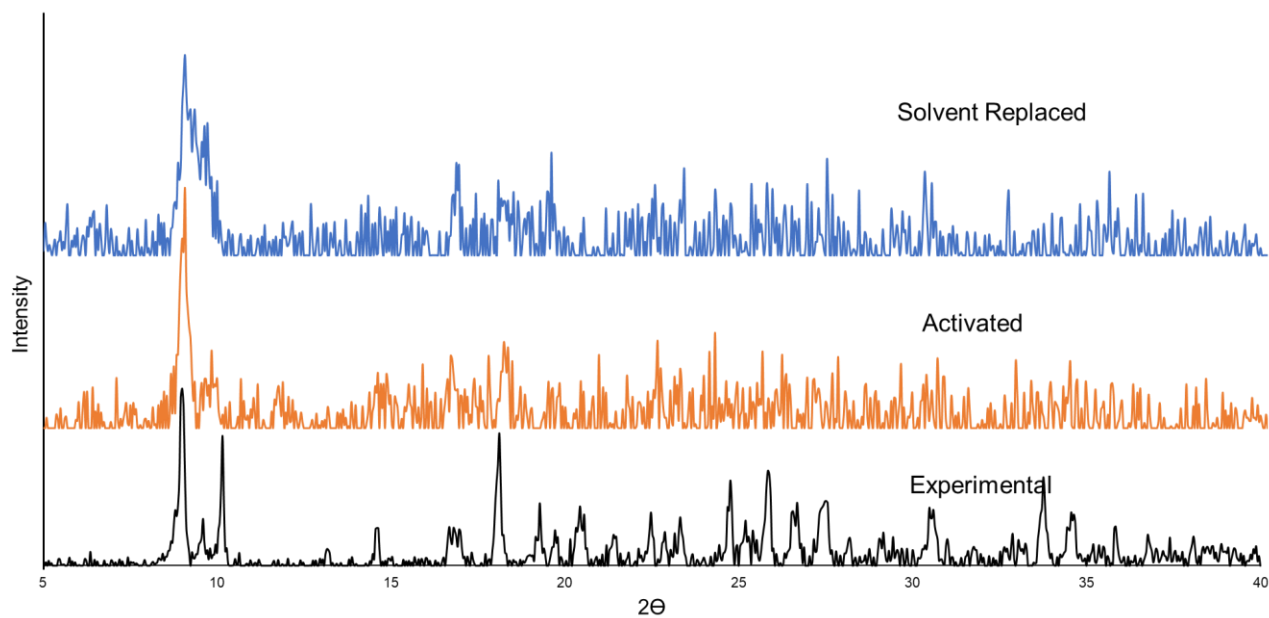

**Figure S3:** The comparison of the activated and solvent replaced PXRDs of compound **3** with the experimental (black), activated (orange), and solvent replaced (blue).

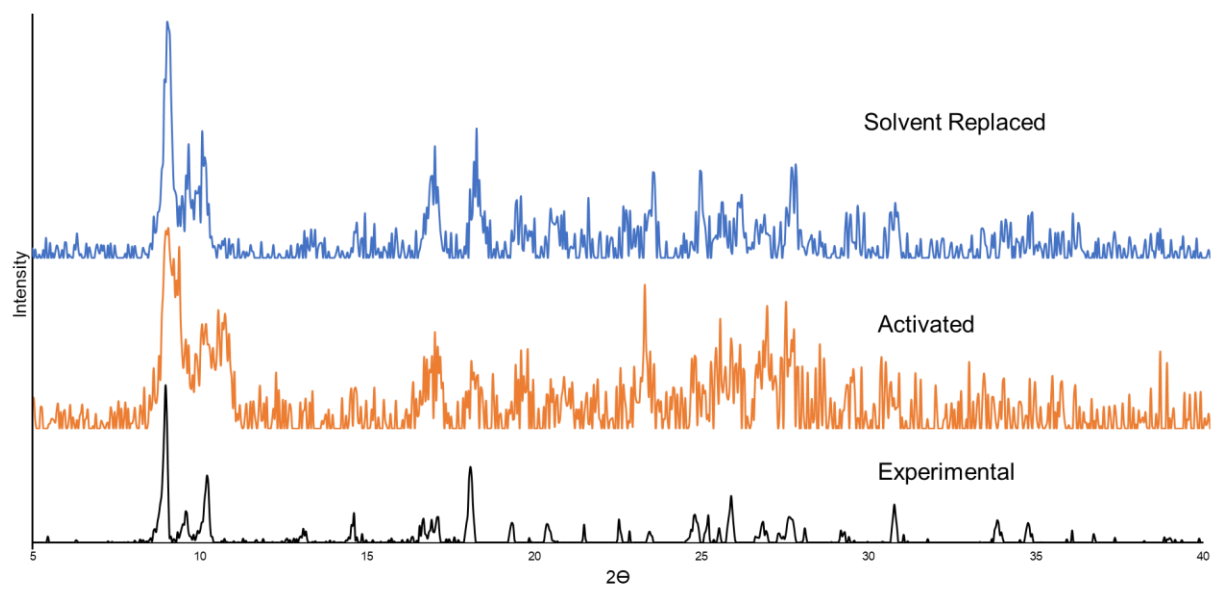

**Figure S4:** The comparison of the activated and solvent replaced PXRDs of compound **4** with the experimental (black), activated (orange), and solvent replaced (blue).

## Thermogravimetric Analysis (TGA)

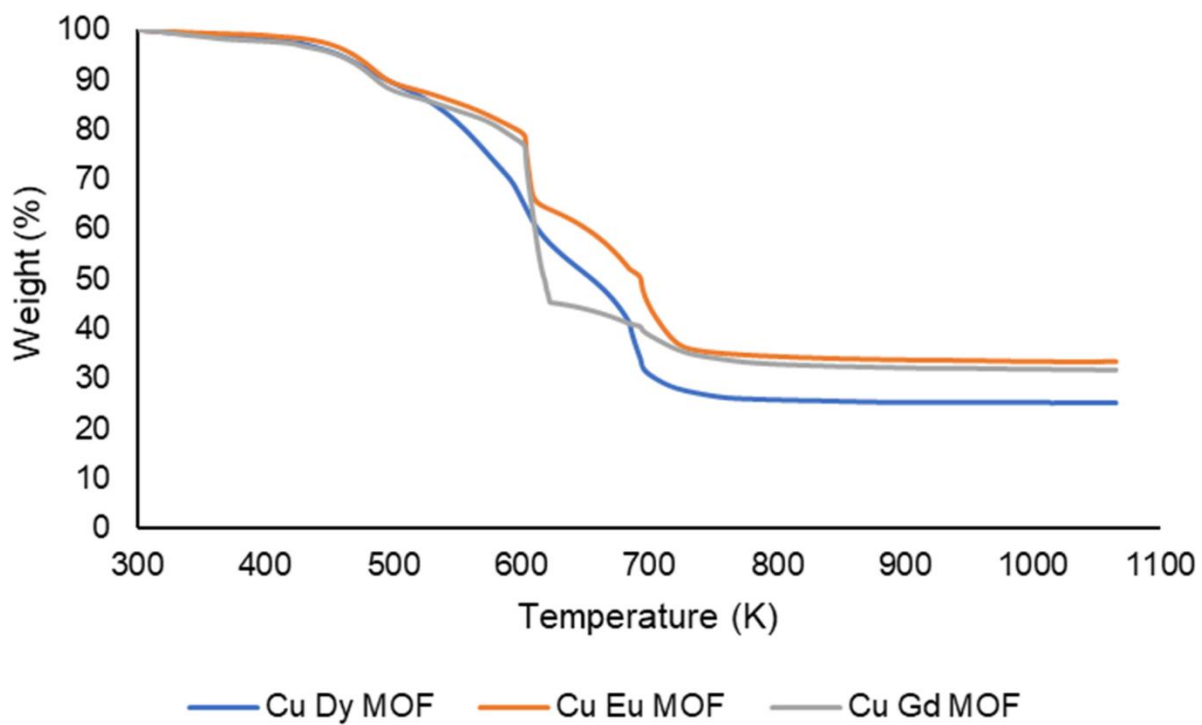

**Figure S5:** The TGA for compound **3**, **4**, and **1**.
